# Supplementary material for: Agronomic Performance and Yield Stability of Elite White Guinea Yam (Dioscorea rotundata) Genotypes Grown in Multiple Environments in Nigeria
Source: Preprints.org preprint supplement (doi:10.20944/preprints202408.0964.v1), 2024-08-14
Supplement: Supplementary file 1 [file supplementary]

## Sheet: list of genotypes
Supplementary Table 1
s/n	Genotypes	Genotype code	status
1	Meccakusa	G1	Local variety
2	TDr1716031	G2	Breeding line
3	TDr1716040	G3	Breeding line
4	TDr1716069	G4	Breeding line
5	TDr1719006	G5	Breeding line
6	TDr1719020	G6	Breeding line
7	TDr1719029	G7	Breeding line
8	TDr1719049	G8	Breeding line
9	TDr1719055	G9	Breeding line
10	TDr1719059	G10	Breeding line
11	TDr1719069	G11	Breeding line
12	TDr1738003	G12	Breeding line
13	TDr1738023	G13	Breeding line
14	TDr1738048	G14	Breeding line
15	TDr1738074	G15	Breeding line
16	TDr1739023	G16	Breeding line
17	TDr1739046	G17	Breeding line
18	TDr1739049	G18	Breeding line
19	TDr1739058	G19	Breeding line
20	TDr1739067	G20	Breeding line
21	TDr1739068	G21	Breeding line
22	TDr1741021	G22	Breeding line
23	TDr1741042	G23	Breeding line
24	TDr1741044	G24	Breeding line
25	TDr1741073	G25	Breeding line

## Sheet: Location
Supplementary Table 2
code	Environment	year
IB22	Ibadan	22
IK22	Ikenne	22
AB22	Abuja	22
IB23	Ibadan	23
IK23	Ikenne	23
AB23	Abuja	23

## Sheet: MTSI selection
Supplementary Table 3
	Genotype	MTSI
1	TDr1739049	1.71
2	TDr1739058	1.89606
3	TDr1741044	2.14192
4	TDr1739023	2.21789
5	TDr1739068	2.63798
6	TDr1716040	2.66401
7	TDr1716031	2.78313
8	TDr1739067	2.90709
9	TDr1738003	2.9086
10	TDr1719049	2.97626
11	TDr1739046	3.36282
12	TDr1741042	3.389
13	TDr1738048	3.63396
14	TDr1719055	3.73216
15	TDr1719069	3.75191
16	TDr1719029	3.84912
17	TDr1719059	3.93877
18	TDr1741073	4.12589
19	TDr1716069	4.1919
20	TDr1738074	4.21742
21	TDr1719020	4.29659
22	TDr1738023	4.56109
23	TDr1741021	4.97703
24	TDr1719006	5.19641
25	Meccakusa	6.4029
